# Supplementary material for: Attenuation of Flightless I Increases Human Pericyte Proliferation, Migration and Angiogenic Functions and Improves Healing in Murine Diabetic Wounds
Source: MDPI journal article supplement (doi:10.3390/ijms21165599), 2020-08-05
Supplement: s1 [file s1]

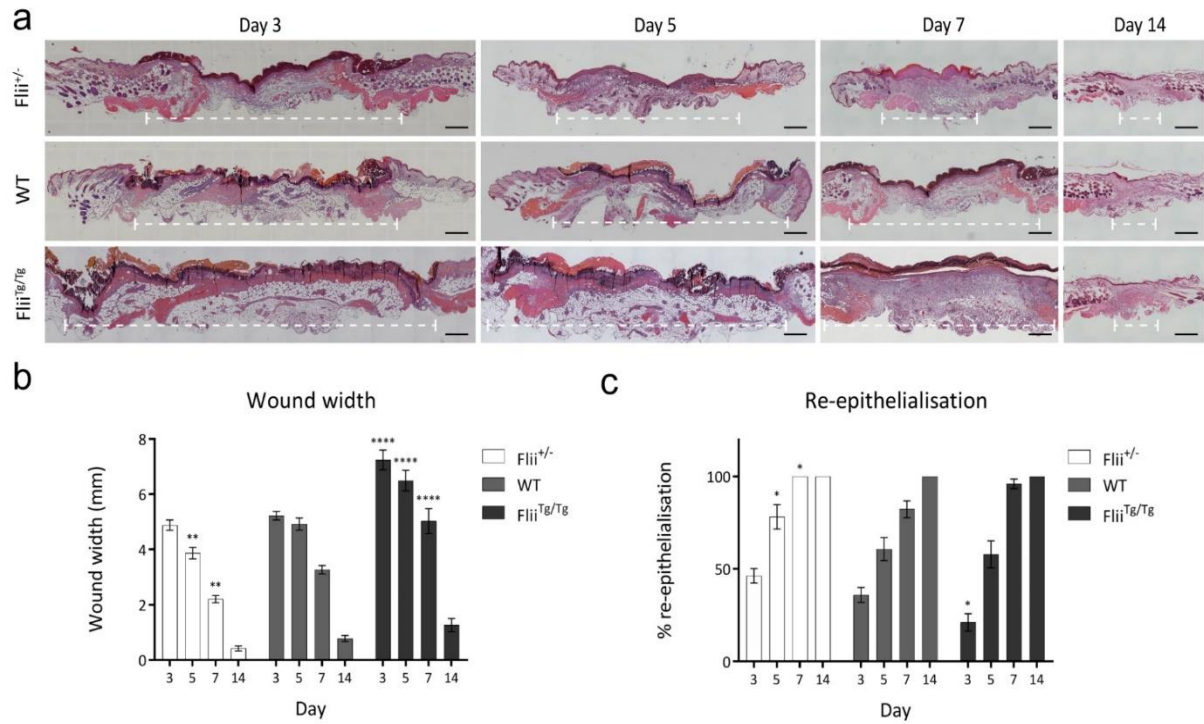

**Figure S1** (a) Hematoxylin and Eosin staining of representative *Flii*<sup>+/-</sup>, WT and *Flii*<sup>Tg/Tg</sup> diabetic excisional day 3, 5, 7 and 14 wounds. Wound width indicated by dashed white line. Composite images taken at 10× objective, scale bar = 0.5 m. (b) Histological wound width measurements of *Flii*<sup>+/-</sup>, WT and *Flii*<sup>Tg/Tg</sup> diabetic excisional day 3, 5, 7 and 14 wounds. Data displayed as mean ± SEM, *n* = 8. (c) Histological measurement of re-epithelialisation represented as % of total epithelial length. Data displayed as mean ± SEM, *n* = 8. Statistical significance was calculated using a two-way ANOVA where \* = *p* < 0.05, \*\* = *p* < 0.01, \*\*\* = *p* < 0.001, \*\*\*\* = *p* < 0.0001.

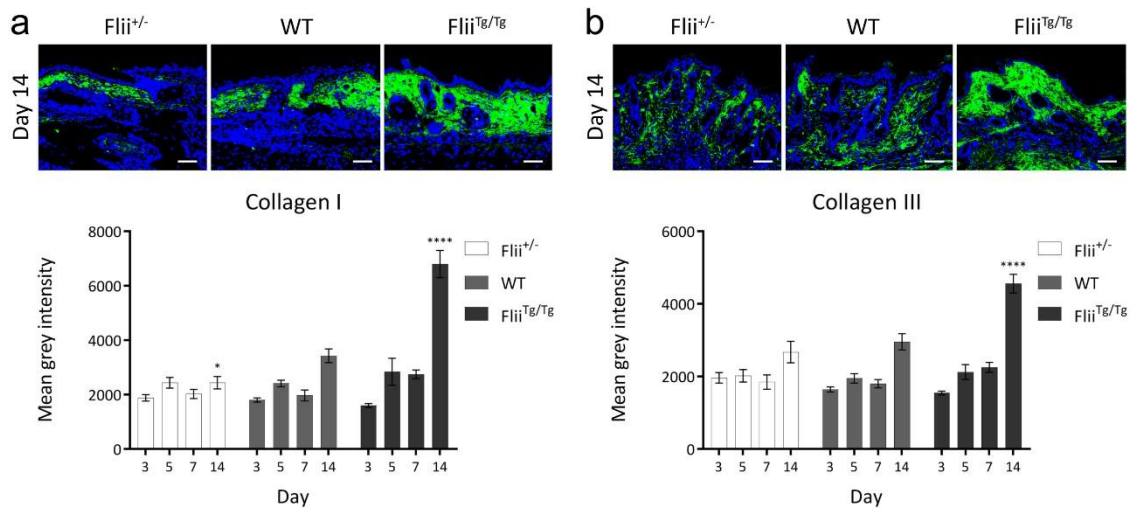

**Figure S2.** (a) Immunohistochemical detection and quantification of collagen I in 4 μm sections of paraffin-embedded diabetic *Flii*<sup>+/-</sup>, WT and *Flii*<sup>Tg/Tg</sup> wounds. (b) Immunohistochemical detection and quantification of collagen III in 4 μm sections of paraffin-embedded diabetic *Flii*<sup>+/-</sup>, WT and *Flii*<sup>Tg/Tg</sup> wounds. Images taken at 20× objective, scale bar = 50 μm. Data displayed as mean ± SEM, *n* = 7.

Statistical significance was calculated using a two-way ANOVA where \* =  $p < 0.05$ , \*\* =  $p < 0.01$ , \*\*\* =  $p < 0.001$ , \*\*\*\* =  $p < 0.0001$ .
